# Supplementary material for: Room temperature spin crossover properties in a series of mixed-anion Fe(NH2trz)3(BF4)2−x(SiF6)x/2 complexes
Source: Royal Society of Chemistry journal article supplement (doi:10.1039/d4dt00267a), 2024-01-01

**Room temperature spin crossover properties in a series of mixed-anion  
 $\text{Fe}(\text{NH}_2\text{trz})_3(\text{BF}_4)_{2-x}(\text{SiF}_6)_{x/2}$  complexes**

Xinyu Yang, Alejandro Enriquez Cabrera, Kane Jacob, Yannick Coppel, Lionel Salmon,\*

Azzedine Bousseksou\*

LCC, CNRS & Université de Toulouse (UPS, INP), 31077 Toulouse, France

\* [lionel.salmon@lcc-toulouse.fr](mailto:lionel.salmon@lcc-toulouse.fr), [azzedine.bousseksou@lcc-toulouse.fr](mailto:azzedine.bousseksou@lcc-toulouse.fr)

**Figure S1:**  $^{19}\text{F}$  MAS ssNMR spectrum for sample **1a-1g** (\*: spinning sidebands)

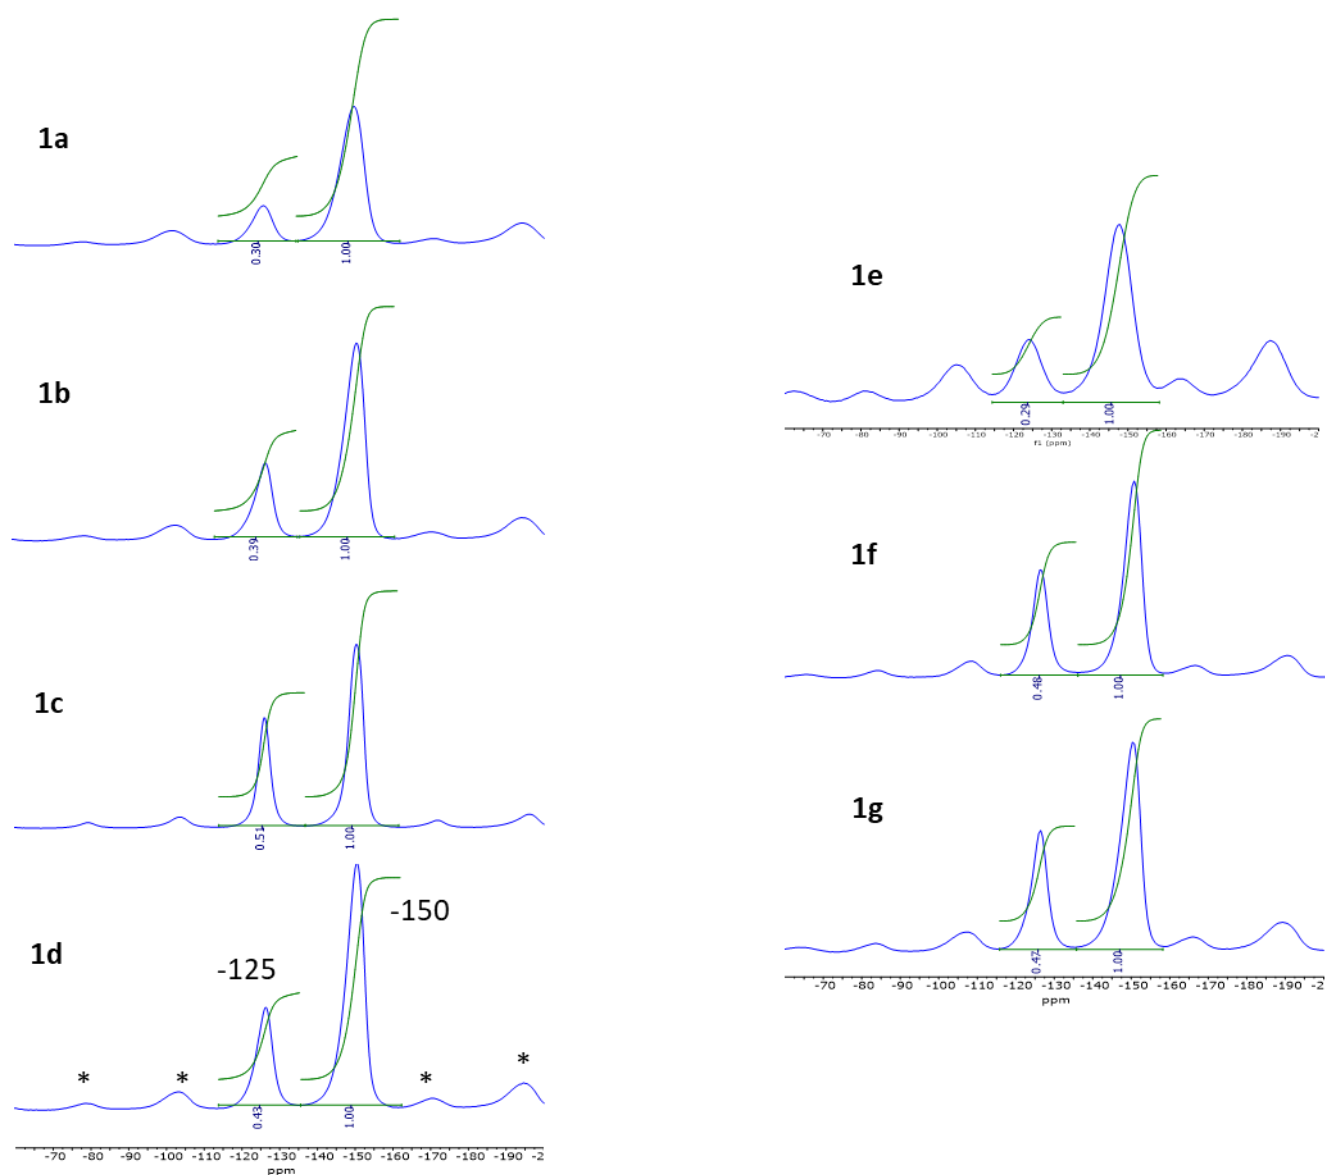

**Figure S2:**  $^{19}\text{F}$  MAS ssNMR spectrum for sample **3d-3f** (\*: spinning sidebands)

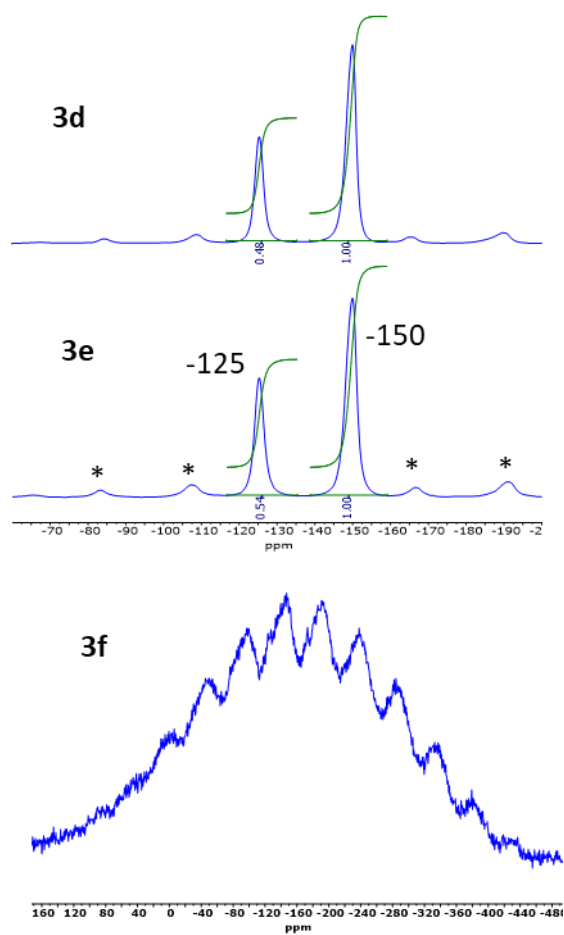

**Figure S3:**  $^{29}\text{Si}$  MAS and CPMAS ssNMR spectrum for **1a-1d**

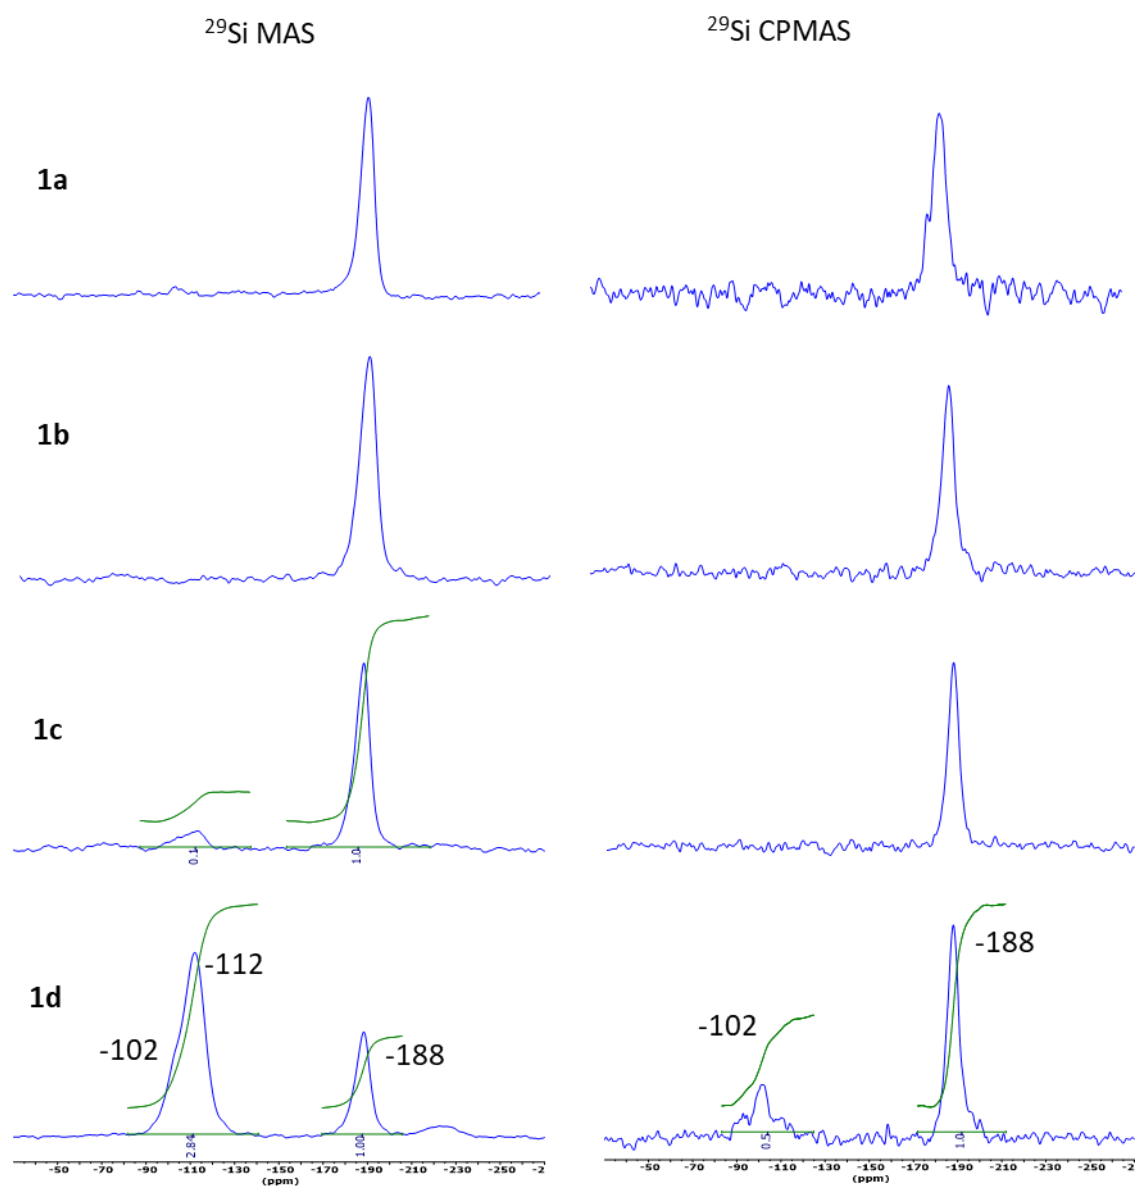

**Figure S4:**  $^{29}\text{Si}$  MAS and CPMAS ssNMR spectrum for **1e-1g**

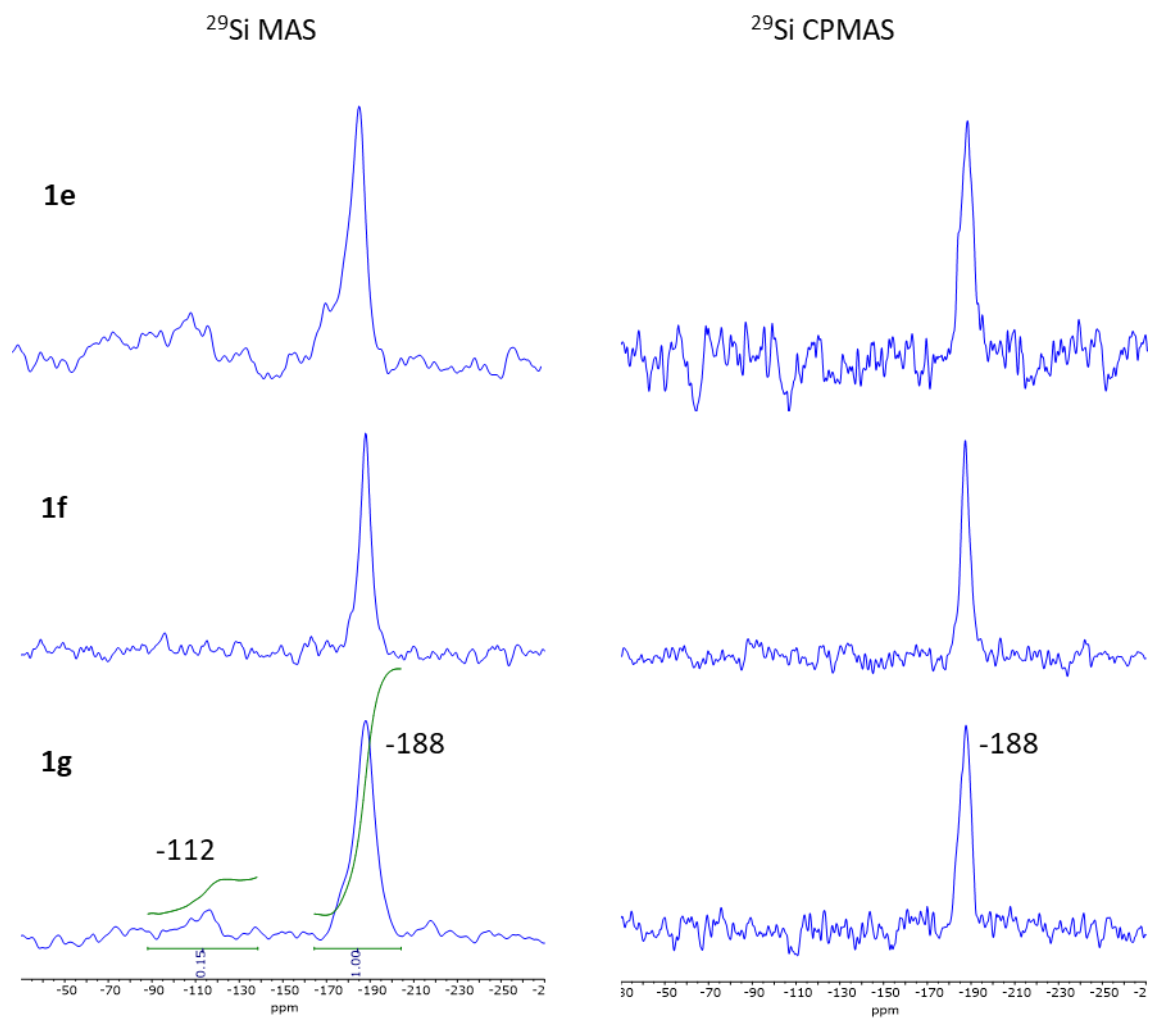

**Figure S5:** Thermal variation of the optical reflectivity (desolvated sample) for **1e-1g** (effect of the reaction time)

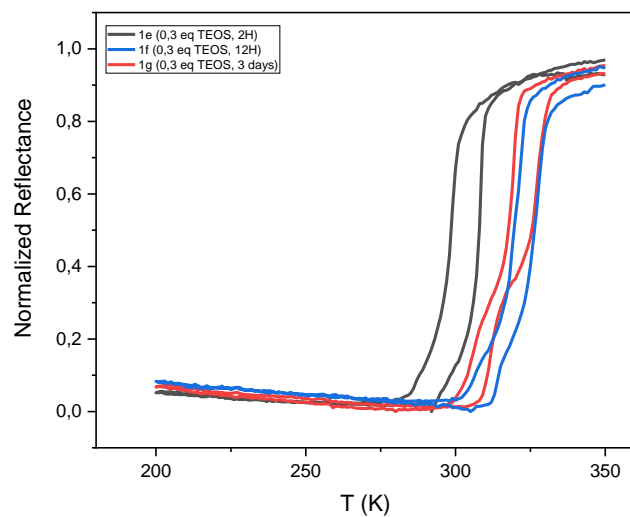

**Figure S6:** Thermal variation of the optical reflectivity upon 3 consecutive thermal cycles for **1f** (cycling stability after a first stabilizing cycle)

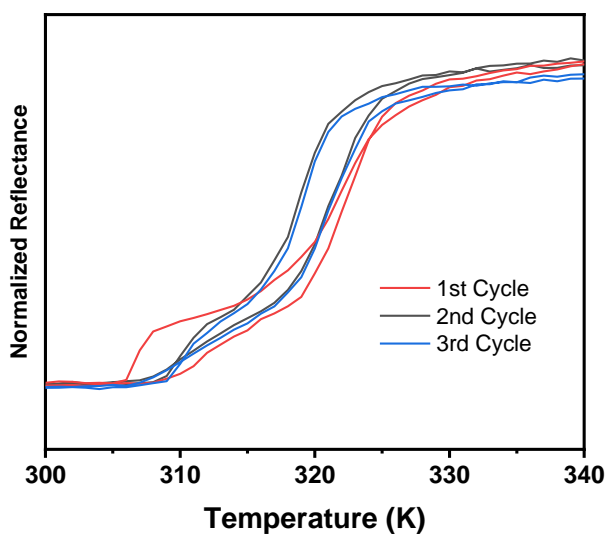

**Figure S7:** Thermal variation of the powder X-ray diffraction patterns for **3d**

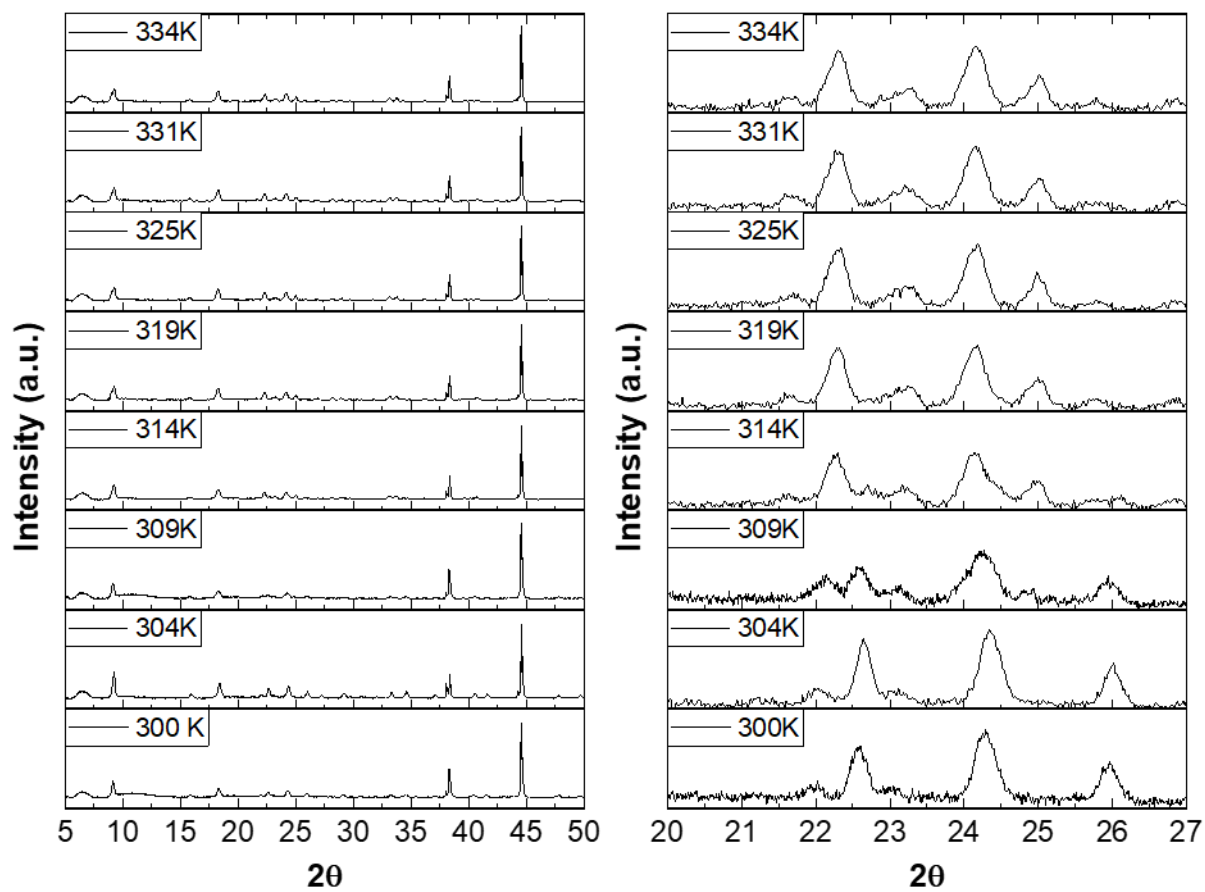

**Figure S8:** IR spectroscopy and thermal variation of the optical reflectivity for PSM reactions over time

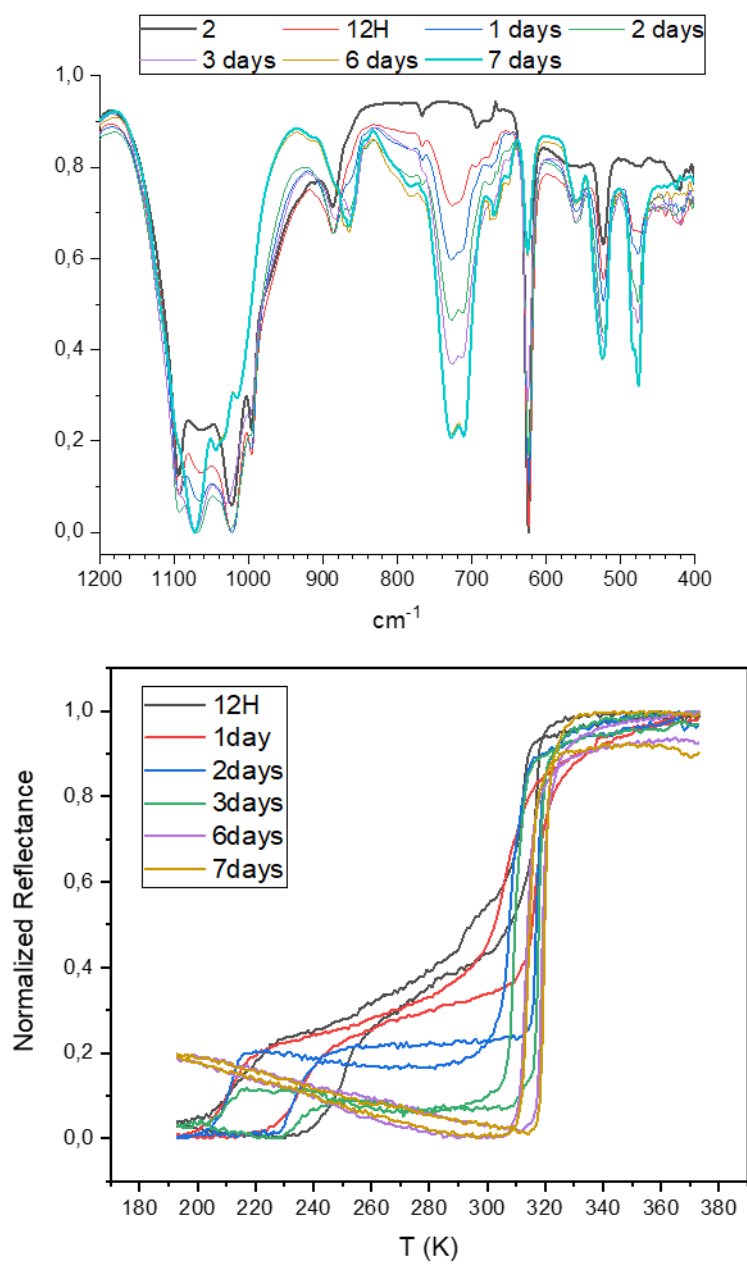

**Figure S9:** Thermal variation of the optical reflectivity upon 3 consecutive thermal cycles for the sample obtained after 7 days by PSM reaction showing the cycling stability after a first stabilizing cycle

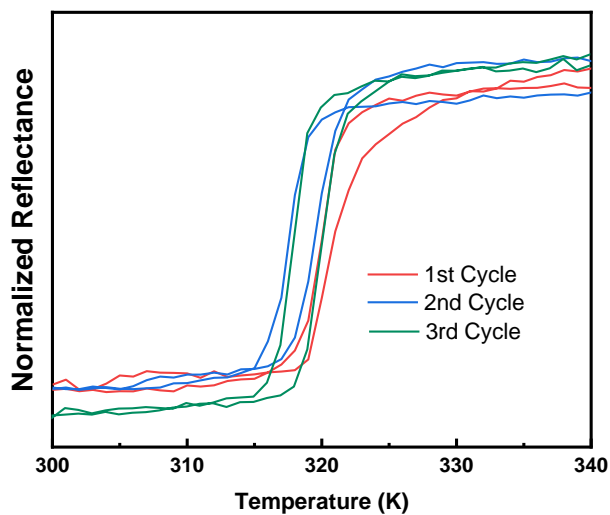

**Figure S10:** Thermal variation of the optical reflectivity for the desolvated sample obtained after 7 days by PSM reaction just after synthesis and after 1-month storage showing the stability in time

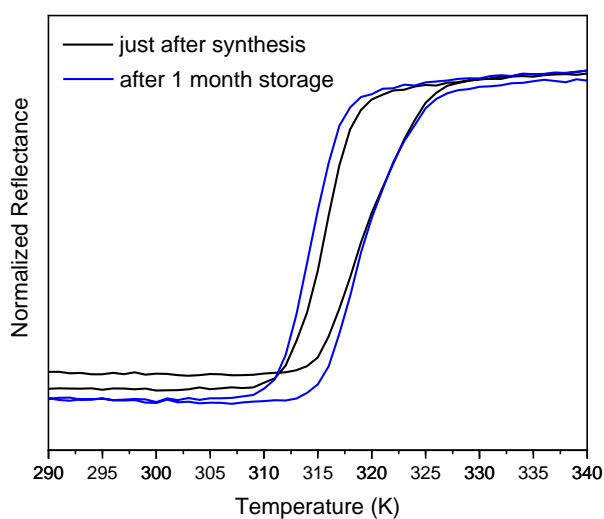



**Figure S11:** Selection of Transmission Electronic Microscopy images for sample **1a-1g**

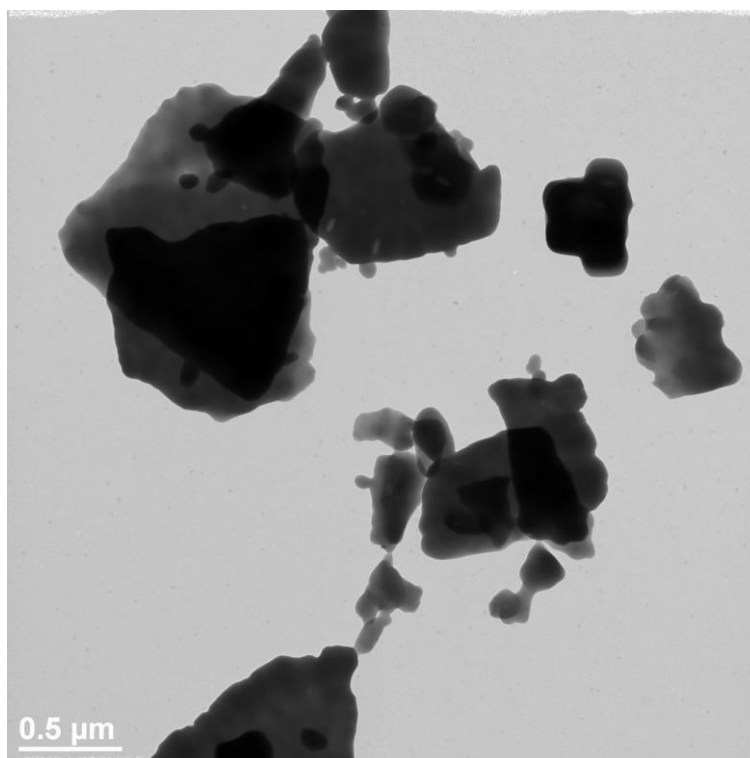

**1a** (0.125 eq TEOS)

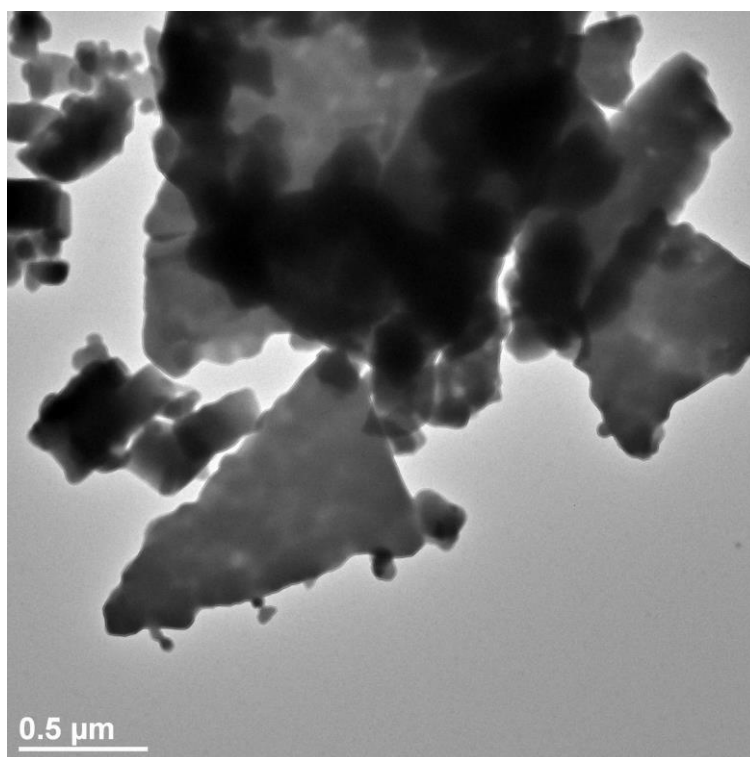

**1b** (0.25 eq TEOS)

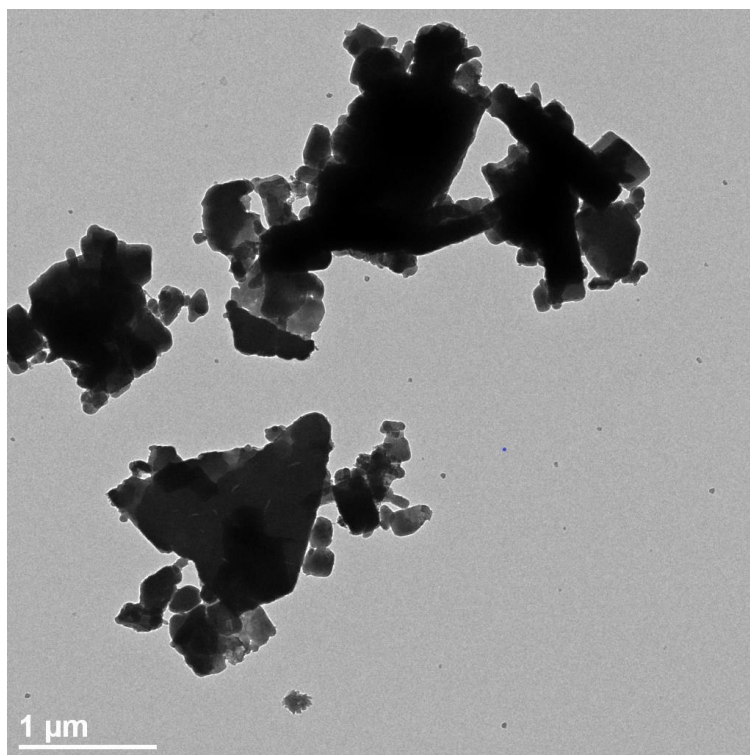

**1c** (0.5 eq TEOS)

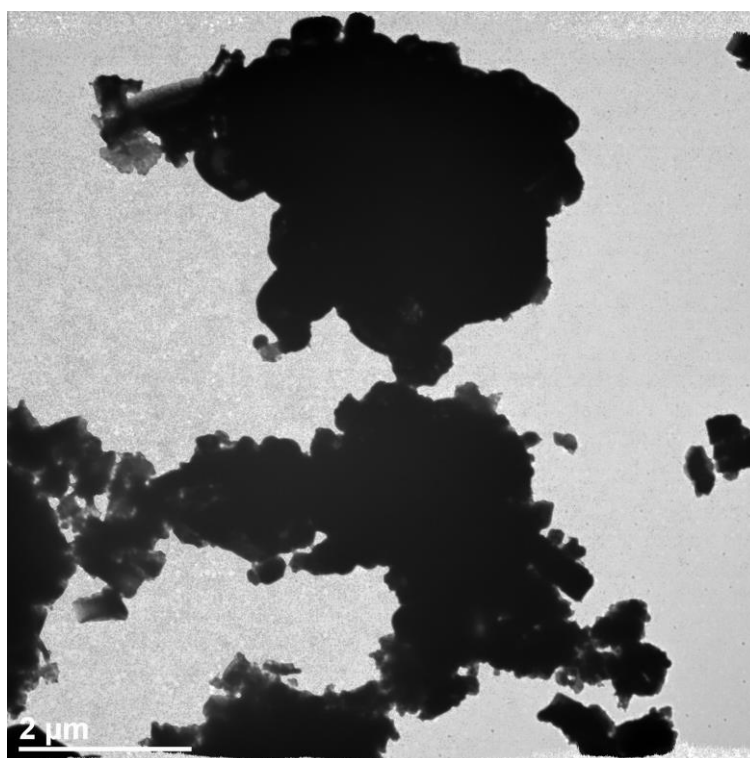

**1d** (1 eq TEOS)

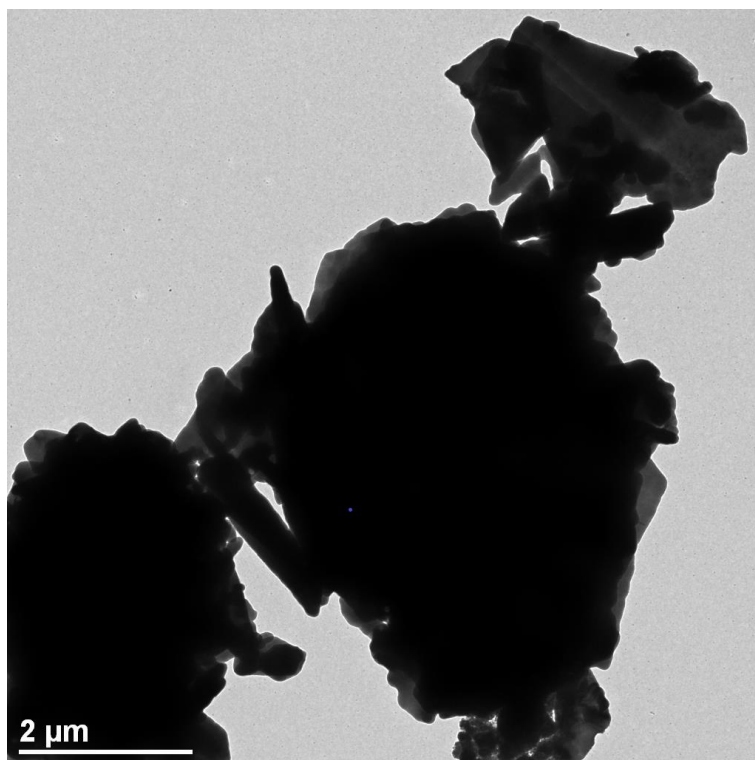

1e (0.3 eq TEOS, 2Hours)

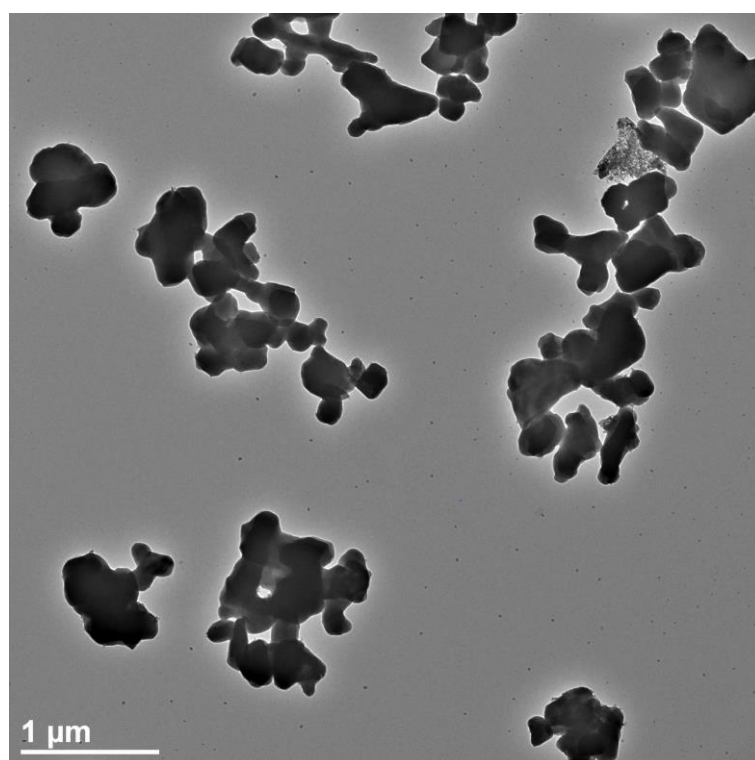

1g (0.3 eq TEOS, 3 Days)

**Figure S12:** Selection of Transmission Electronic Microscopy images over time for PSM syntheses with 0.3 eq TEOS

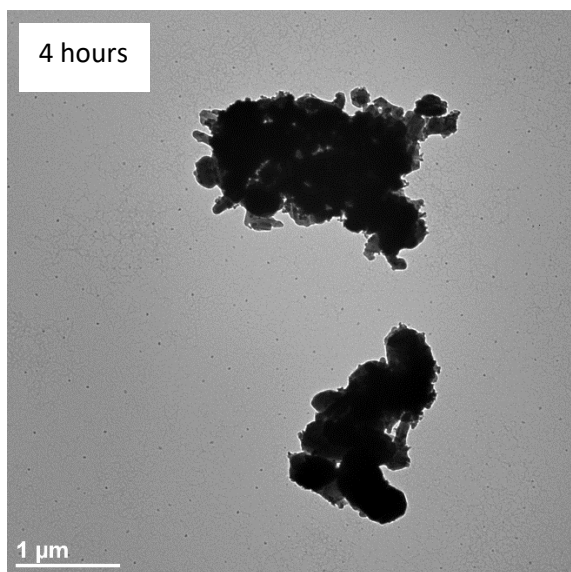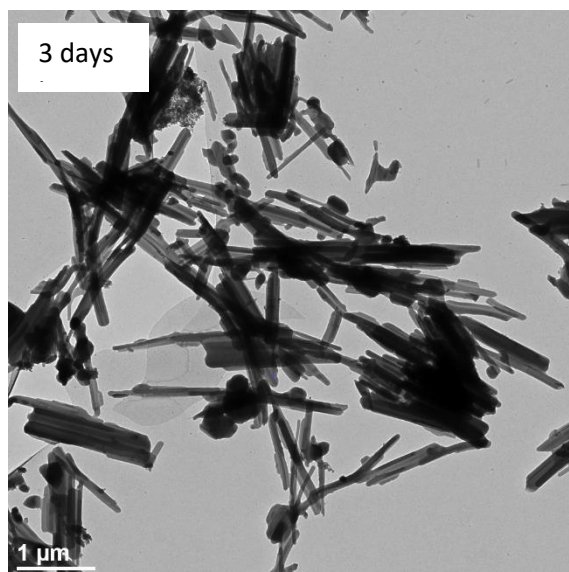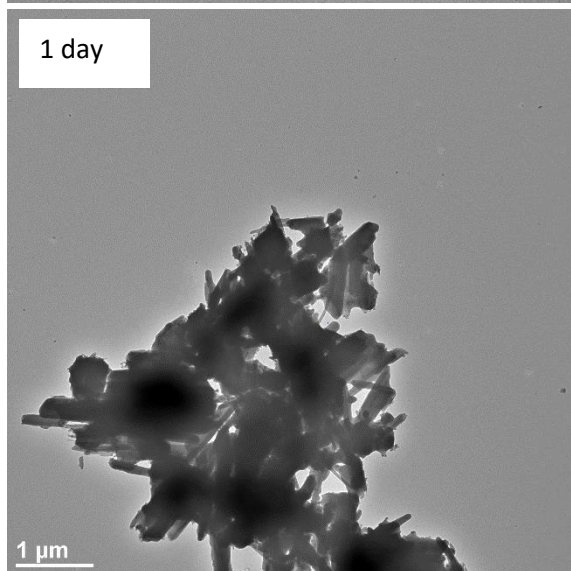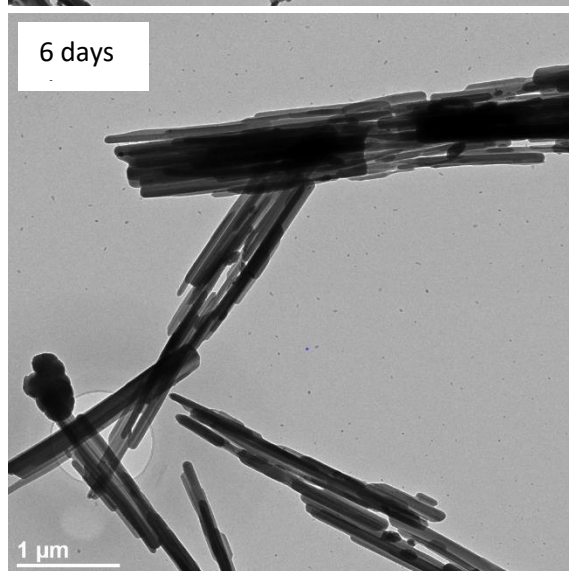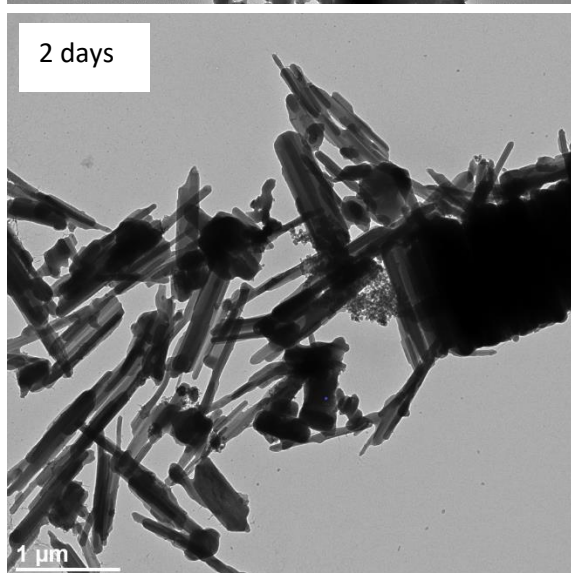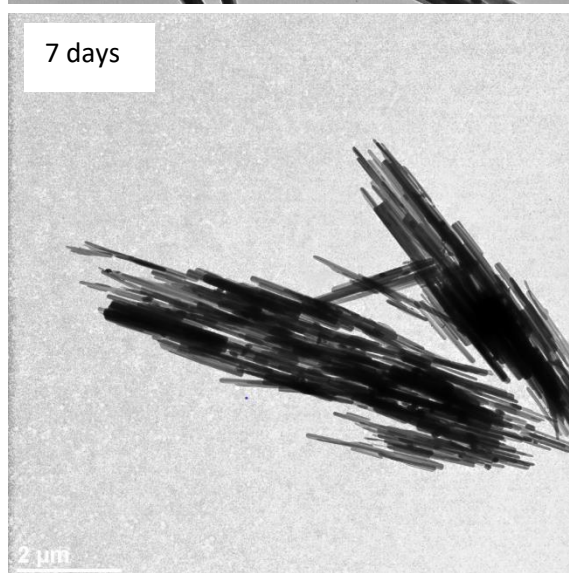

Supplement: d4dt00267a1.pdf [file d4dt00267a1.pdf]
